# Supplementary material for: Analysis of the Model of Atherosclerosis Formation in Pig Hearts as a Result of Impaired Activity of DNA Repair Enzymes
Source: MDPI journal article supplement (doi:10.3390/ijms25042282), 2024-02-14
Supplement: s1 [file s1]

Table S1. Data published previously [41, 82]. Ultrasound measurements of the thickness of complex intima+media of the femoral artery (IMT FA), High-density lipoprotein (HDL), low-density lipoprotein (LDL), triglycerides (TG). \* Statistical significance.

|                                     | BDG              |                  | UDG             |                  | RG             |                  |
|-------------------------------------|------------------|------------------|-----------------|------------------|----------------|------------------|
|                                     | Start            | end              | start           | End              | Start          | end              |
| IMT FA ultrasound ( $\mu\text{m}$ ) |                  | 638 $\pm$ 87     |                 | 705 $\pm$ 108*   |                | 686 $\pm$ 102    |
| Glucose (mg/dl)                     | 87.7 $\pm$ 14.42 | 94.6 $\pm$ 13.7  | 96.8 $\pm$ 18.7 | 102.5 $\pm$ 27.4 | 100.3 $\pm$ 22 | 103.8 $\pm$ 26.1 |
| Insulin ( $\mu\text{g/ml}$ )        | 38.8 $\pm$ 4.78  | 45.7 $\pm$ 14.65 | 42.3 $\pm$ 11.6 | 52.8 $\pm$ 19.7  | 53.3 $\pm$ 30  | 79.4 $\pm$ 52.9  |
| Cholesterol serum (mmol/l)          | -                | 2.1 $\pm$ 0.45   | -               | 2.02 $\pm$ 0.48  | -              | 1.9 $\pm$ 0.51   |
| HDL serum (mmol/l)                  | -                | 0.75 $\pm$ 0.13  | -               | 0.88 $\pm$ 0.34  | -              | 0.65 $\pm$ 0.1*  |
| LDL serum (mmol/l)                  | -                | 1.09 $\pm$ 0.24  | -               | 1.17 $\pm$ 0.17  | -              | 1.18 $\pm$ 0.2   |
| TG serum (mmol/l)                   | -                | 0.32 $\pm$ 0.2   | -               | 0.53 $\pm$ 0.34  | -              | 0.49 $\pm$ 0.21* |
